# Supplementary material for: A novel high efficiency polar photocatalyst, Zn(IO3)2: synthesis, crystal structure and photocatalytic activity
Source: Royal Society of Chemistry journal article supplement (doi:10.1039/d1nj00396h), 2021-01-01
Supplement: d1nj00396h1.pdf [file d1nj00396h1.pdf]

ARTICLE

## A novel high efficiency polar photocatalyst, $\text{Zn}(\text{IO}_3)_2$ : Synthesis, Crystal Structure and Photocatalytic Activity

Received 00th January 20xx,  
Accepted 00th January 20xx

DOI: 10.1039/x0xx00000x

Wenwu Zhao,<sup>a, b</sup> Jinqiang Liu,<sup>a</sup> Xiuwen Wang,<sup>a, b</sup> Yan Huang,<sup>a</sup> Haijing Zhou,<sup>a</sup> Jianyuan Yu,<sup>a</sup> Jian Liu,<sup>\*a, b</sup> Bin Hao,<sup>a, b</sup> Xiaoliu Wang<sup>a</sup> and Yingna Li<sup>a</sup>

Polarized  $\text{Zn}(\text{IO}_3)_2$  nanorods have been successfully prepared by a simple hydrothermal method. The crystal structure and morphology of  $\text{Zn}(\text{IO}_3)_2$  were detected by XRD, TEM and SEM.  $\text{Zn}(\text{IO}_3)_2$  nanorods have been fabricated and demonstrated excellent catalytic activity. The obtained photocatalytic efficiency is higher than that of a commercial  $\text{TiO}_2$  P25 catalyst under UV ( $\lambda > 254$  nm) light irradiation. By combining time-resolved photoluminescence (PL) and BET measurements, it can be revealed that the enhanced photocatalytic performance of  $\text{Zn}(\text{IO}_3)_2$  nanorods can be properly attributed to the promoted separation and prolonged lifetime of the photogenerated carriers caused by the internal polarization field.

### Supporting information

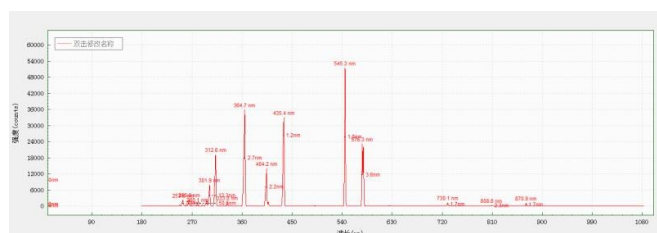

Fig. S1 The wavelength range of mercury lamp.

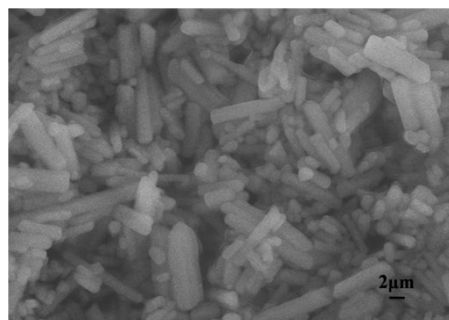

Fig.S3 SEM image of  $\text{Zn}(\text{IO}_3)_2$ .

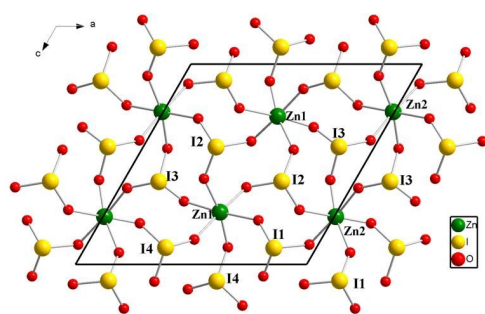

Fig. S2 Ball-and-stick model of  $\text{Zn}(\text{IO}_3)_2$  viewed along the  $b$ -axis.

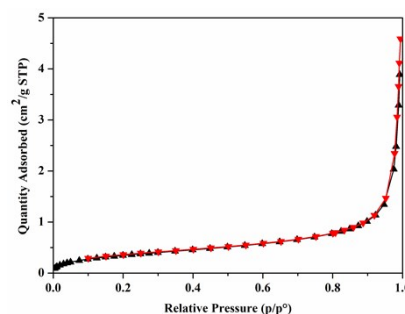

Fig. S4 Nitrogen adsorption and desorption isotherms of  $\text{Zn}(\text{IO}_3)_2$ .

<sup>a</sup> Department of Environmental and Chemical Engineering, Tangshan College, Tangshan 063000, China. Email: sword\_liujian@aliyun.com

<sup>b</sup> Key Laboratory of Micro-nano Materials Preparation and Application of Tangshan City, Tangshan 063000, China

† Electronic Supplementary Information (ESI) available. See DOI: 10.1039/x0xx00000x
